# Supplementary material for: Phonon-induced relaxation mechanisms are changed by a chelating effect in a CoII single-ion magnet
Source: Royal Society of Chemistry journal article supplement (doi:10.1039/d1dt03515k), 2022-01-01
Supplement: d1dt03515k1.pdf [file d1dt03515k1.pdf]

## Supporting Information

### Phonon-Induced Relaxation Mechanisms are Changed by a Chelating Effect in a Co<sup>II</sup> Single-Ion Magnet

Yu-Siang, Lou,<sup>a</sup> Bo-Ruei Lin,<sup>a</sup> Chen-Ming Wu,<sup>a</sup> Su-Ying Chien<sup>b</sup> and En-Che Yang<sup>\*a</sup>

- 
- a Y.-S. Lou, B.-R. Lin, C.-M. Wu and Prof. E.-C. Yang  
Department of Chemistry  
Fu-Jen Catholic University  
Address 1: Hsinchuang, New Taipei City, 24205, Taiwan, Republic of China  
E-mail: 071549@mail.fju.edu.tw
- b Dr. S.-Y. Chien  
Instrumentation Centre  
College of Science, National Taiwan University  
Taipei, 10672, Taiwan, Republic of China.

**Scheme 1S** Ligands used in the literature. (a) used in ref 13 (b) used in ref 14 (c) used in ref 15. Combining (b) and (c) are the ligands used in current work compound **1**..page 2S

**Figure 1S** the structures of compounds (**1**) .....page 2S

**Figure 2S.** Different  $\pi$ - $\pi$  stacking ways are found in the lattice of compound **1**..page 3S

**Table 1S.** Crystal data and structure refinement for Compound **1**.....page 4S

**Figure 3S** the structures of compounds (**2**).....page 5S

**Figure 4S** The short contact in compounds (**2**). The nearby aromatic rings are parallel, but no  $\pi$ - $\pi$  interactions can be seen. ....page 5S

**Table 2S.** Crystal data and experimental details for Compound **2**.....page 6S

**Figure 5S** the structures of compounds (**3**).....page 7S

**Table 3S.** Crystal data and experimental details for Compound **3**.....page 8S

**Figure 6S** the result of reduced magnetization of compound (**2**).....page 9S

**Figure 7S.** the result of reduced magnetization of compound (**3**) .....page 9S

**Figure 8S.** Frequency dependence of the in-phase (top) and out-of-phase signals (bottom) of compound (**1**) under *zero* dc field.....page 10S

**Figure 9S.** Field dependence of the in-phase and the out-of-phase signals of compound (**2**) under 0-3000 G dc field at 2.8 K.....page 11S

**Figure 10S.** Frequency dependence of the in-phase and out-of-phase signals of compound (**2**) under 1000 G dc field.....page 11S

**Figure 11S.** Field dependence of the in-phase and the out-of-phase signals of compound (**3**) under 0-3000 G dc field at 4.0 K.....page 12S

**Figure 12S.** Frequency dependence of the in-phase and out-of-phase signals of compound (3) under 1000 G dc field.....page 12S

**Figure 13S.** Temperature dependence of the out-of-phase signals of compound (2) and (3) under 0 G dc field. ....page 13S

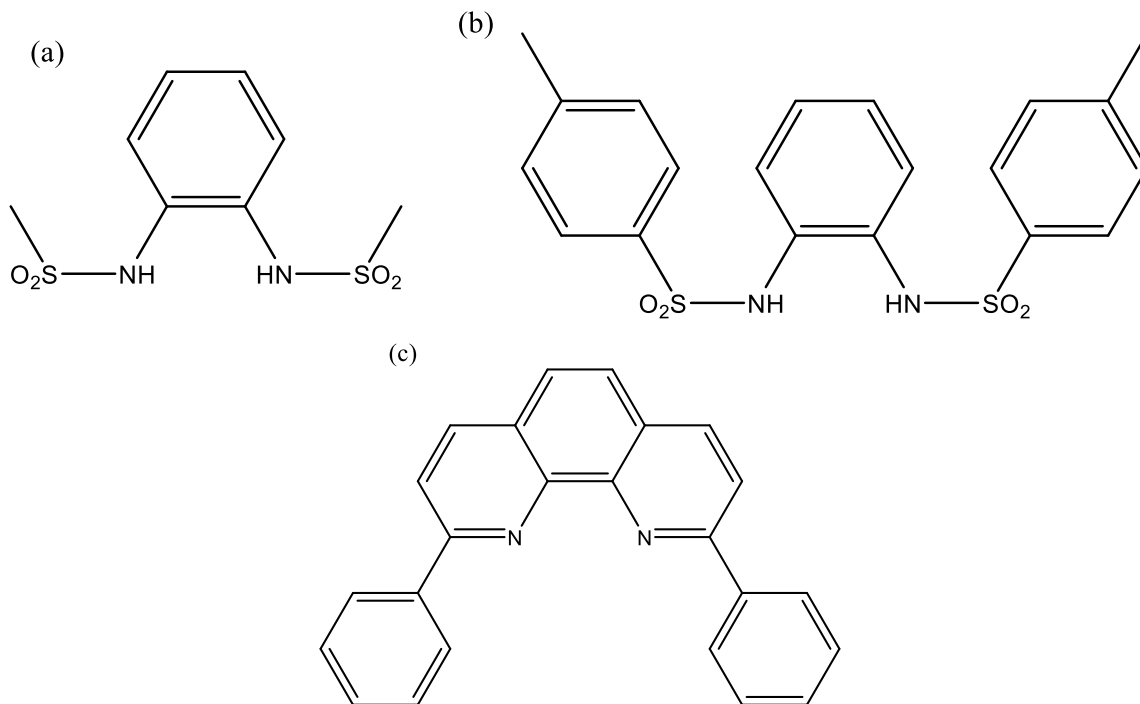

**Scheme 1S.** Ligands used in the literature. (a) used in ref 13 (b) used in ref 14 (c) used in ref 15. Combining (b) and (c) are the ligands used in current work compound 1.

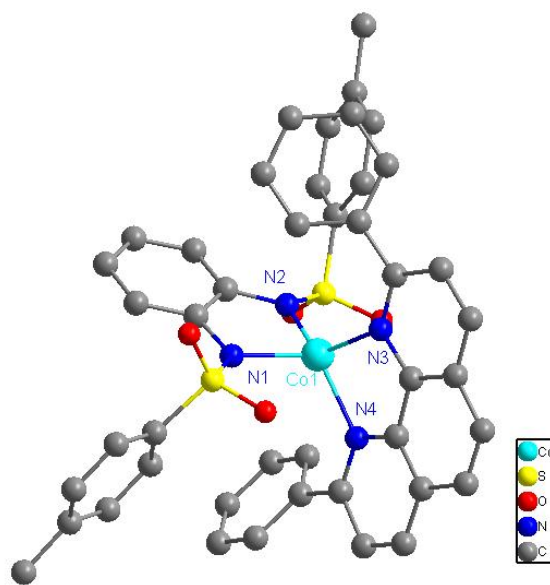

**Figure 1S** the structures of compounds (1)

(a)

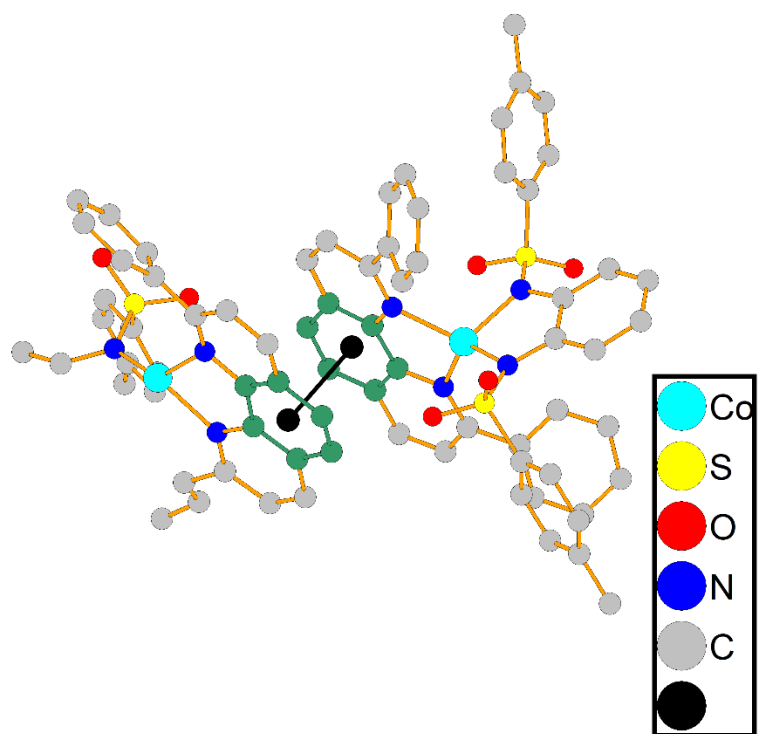

(b)

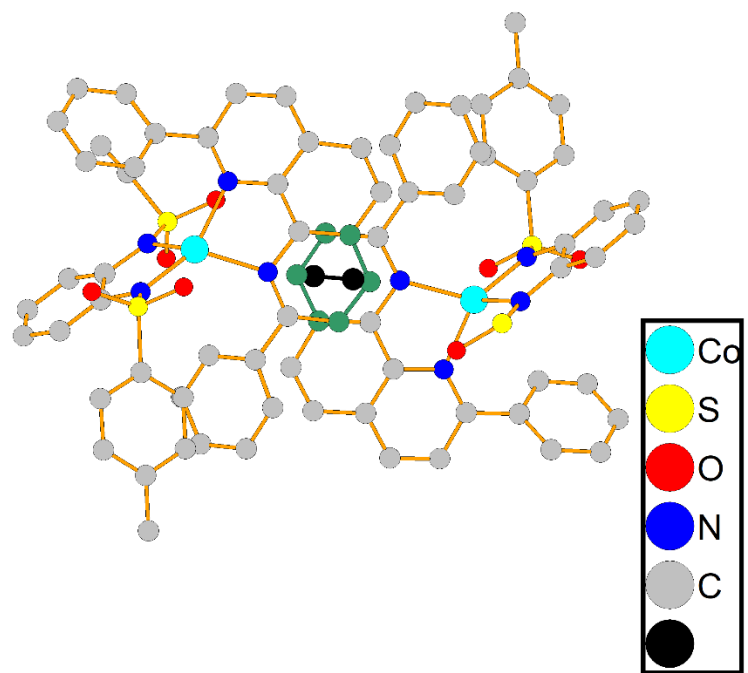

**Figure 2S.** Different  $\pi$ - $\pi$  stacking ways are found in the lattice of compound **1**.

---

**Table 1S.** Crystal data and structure refinement for Compound **1**.

|                                   |                                                                                                             |
|-----------------------------------|-------------------------------------------------------------------------------------------------------------|
| Identification code               | ic20765                                                                                                     |
| Empirical formula                 | C45 H39 Co N4 O6 S2                                                                                         |
| Formula weight                    | 854.85                                                                                                      |
| Temperature                       | 150(2) K                                                                                                    |
| Wavelength                        | 0.71073 Å                                                                                                   |
| Crystal system                    | Monoclinic                                                                                                  |
| Space group                       | P2 <sub>1</sub> /c                                                                                          |
| Unit cell dimensions              | a = 19.5098(16) Å      α = 90°.<br>b = 31.080(3) Å      β = 104.583(3)°.<br>c = 14.1457(12) Å      γ = 90°. |
| Volume                            | 8301.1(12) Å <sup>3</sup>                                                                                   |
| Z                                 | 8                                                                                                           |
| Density (calculated)              | 1.368 Mg/m <sup>3</sup>                                                                                     |
| Absorption coefficient            | 0.568 mm <sup>-1</sup>                                                                                      |
| F(000)                            | 3552                                                                                                        |
| Crystal size                      | 0.212 x 0.041 x 0.025 mm <sup>3</sup>                                                                       |
| Theta range for data collection   | 1.982 to 25.185°.                                                                                           |
| Index ranges                      | -23 ≤ h ≤ 23, -37 ≤ k ≤ 37, -13 ≤ l ≤ 16                                                                    |
| Reflections collected             | 65123                                                                                                       |
| Independent reflections           | 14807 [R(int) = 0.0941]                                                                                     |
| Completeness to theta = 25.185°   | 99.3 %                                                                                                      |
| Absorption correction             | Semi-empirical from equivalents                                                                             |
| Max. and min. transmission        | 0.8129 and 0.6534                                                                                           |
| Refinement method                 | Full-matrix least-squares on F <sup>2</sup>                                                                 |
| Data / restraints / parameters    | 14807 / 10 / 1036                                                                                           |
| Goodness-of-fit on F <sup>2</sup> | 1.355                                                                                                       |
| Final R indices [I > 2σ(I)]       | R1 = 0.0859, wR2 = 0.2097                                                                                   |
| R indices (all data)              | R1 = 0.1092, wR2 = 0.2214                                                                                   |
| Extinction coefficient            | n/a                                                                                                         |
| Largest diff. peak and hole       | 1.113 and -1.266 e.Å <sup>-3</sup>                                                                          |

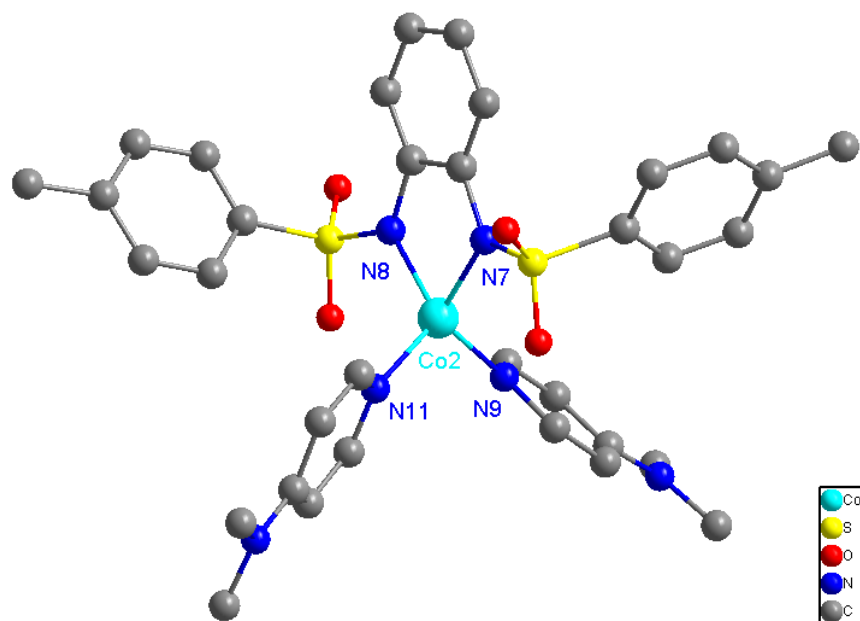

**Figure 3S** the structures of compounds (2)

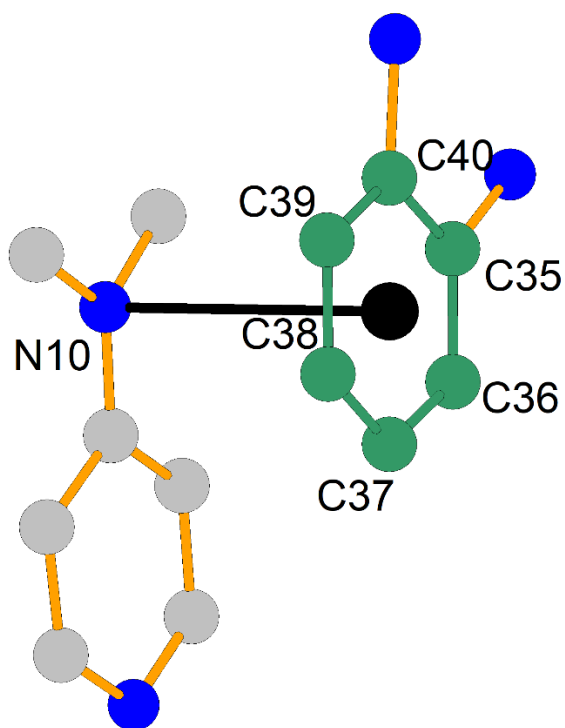

**Figure 4S** The short contact in compounds (2). The nearby aromatic rings are parallel, but no  $\pi$ - $\pi$  interactions can be seen.

**Table 2S.** Crystal data and experimental details for Compound **2**.

|                                   |                                                                                          |                 |
|-----------------------------------|------------------------------------------------------------------------------------------|-----------------|
| Empirical formula                 | C <sub>36.50</sub> H <sub>44</sub> Cl Co N <sub>6</sub> O <sub>4.50</sub> S <sub>2</sub> |                 |
| Formula weight                    | 797.27                                                                                   |                 |
| Crystal system                    | Monoclinic                                                                               |                 |
| Space group                       | P2 <sub>1</sub> /n                                                                       |                 |
| Unit cell dimensions              | a = 18.7232(14) Å                                                                        | α = 90°.        |
|                                   | b = 12.8260(9) Å                                                                         | β = 95.582(7)°. |
|                                   | c = 32.042(3) Å                                                                          | γ = 90°.        |
| Volume                            | 7658.3(10) Å <sup>3</sup>                                                                |                 |
| Z                                 | 8                                                                                        |                 |
| F(000)                            | 3336                                                                                     |                 |
| Density (calculated)              | 1.383 Mg/m <sup>3</sup>                                                                  |                 |
| Wavelength                        | 0.71073 Å                                                                                |                 |
| Cell parameters reflections used  | 5594                                                                                     |                 |
| Theta range for Cell parameters   | 3.9800 to 27.1300°.                                                                      |                 |
| Absorption coefficient            | 0.675 mm <sup>-1</sup>                                                                   |                 |
| Temperature                       | 100(2) K                                                                                 |                 |
| Crystal size                      | 0.15 x 0.10 x 0.10 mm <sup>3</sup>                                                       |                 |
| Data collection                   |                                                                                          |                 |
| Diffractometer                    | Xcalibur, Atlas, Gemini                                                                  |                 |
| Absorption correction             | Semi-empirical from equivalents                                                          |                 |
| Max. and min. transmission        | 1.00000 and 0.92784                                                                      |                 |
| No. of measured reflections       | 38187                                                                                    |                 |
| No. of independent reflections    | 17538 [R(int) = 0.0815]                                                                  |                 |
| No. of observed [I > 2σ(I)]       | 8547                                                                                     |                 |
| Completeness to theta = 25.242°   | 99.8 %                                                                                   |                 |
| Theta range for data collection   | 3.115 to 27.500°.                                                                        |                 |
| Refinement                        |                                                                                          |                 |
| Final R indices [I > 2σ(I)]       | R1 = 0.0888, wR2 = 0.1993                                                                |                 |
| R indices (all data)              | R1 = 0.1906, wR2 = 0.2873                                                                |                 |
| Goodness-of-fit on F <sup>2</sup> | 1.066                                                                                    |                 |
| No. of reflections                | 17538                                                                                    |                 |
| No. of parameters                 | 893                                                                                      |                 |
| No. of restraints                 | 12                                                                                       |                 |
| Largest diff. peak and hole       | 1.488 and -1.257 e.Å <sup>-3</sup>                                                       |                 |

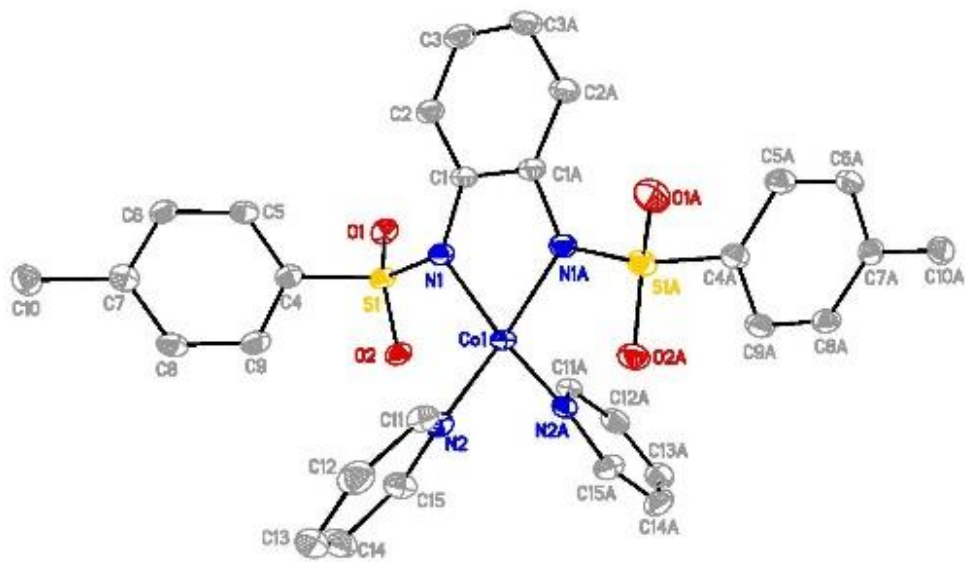

**Figure 5S** the structures of compounds (3)

**Table 3S.** Crystal data and experimental details for Compound **3**.

|                                   |                                                                                 |                  |
|-----------------------------------|---------------------------------------------------------------------------------|------------------|
| Empirical formula                 | C <sub>30</sub> H <sub>28</sub> Co N <sub>4</sub> O <sub>4</sub> S <sub>2</sub> |                  |
| Formula weight                    | 631.61                                                                          |                  |
| Crystal system                    | Monoclinic                                                                      |                  |
| Space group                       | C2/c                                                                            |                  |
| Unit cell dimensions              | a = 16.6621(18) Å                                                               | α = 90°.         |
|                                   | b = 11.5428(12) Å                                                               | β = 99.816(10)°. |
|                                   | c = 14.7676(15) Å                                                               | γ = 90°.         |
| Volume                            | 2798.6(5) Å <sup>3</sup>                                                        |                  |
| Z                                 | 4                                                                               |                  |
| F(000)                            | 1308                                                                            |                  |
| Density (calculated)              | 1.499 Mg/m <sup>3</sup>                                                         |                  |
| Wavelength                        | 0.71073 Å                                                                       |                  |
| Cell parameters reflections used  | 3764                                                                            |                  |
| Theta range for Cell parameters   | 4.1590 to 29.9200°.                                                             |                  |
| Absorption coefficient            | 0.807 mm <sup>-1</sup>                                                          |                  |
| Temperature                       | 100(2) K                                                                        |                  |
| Crystal size                      | 0.25 x 0.20 x 0.10 mm <sup>3</sup>                                              |                  |
| Data collection                   |                                                                                 |                  |
| Diffractionmeter                  | Xcalibur, Atlas, Gemini                                                         |                  |
| Absorption correction             | Semi-empirical from equivalents                                                 |                  |
| Max. and min. transmission        | 1.00000 and 0.92056                                                             |                  |
| No. of measured reflections       | 7300                                                                            |                  |
| No. of independent reflections    | 3215 [R(int) = 0.0359]                                                          |                  |
| No. of observed [I > 2σ(I)]       | 2841                                                                            |                  |
| Completeness to theta = 25.242°   | 99.8 %                                                                          |                  |
| Theta range for data collection   | 3.363 to 27.496°.                                                               |                  |
| Refinement                        |                                                                                 |                  |
| Final R indices [I > 2σ(I)]       | R1 = 0.0414, wR2 = 0.1108                                                       |                  |
| R indices (all data)              | R1 = 0.0473, wR2 = 0.1179                                                       |                  |
| Goodness-of-fit on F <sup>2</sup> | 1.016                                                                           |                  |
| No. of reflections                | 3215                                                                            |                  |
| No. of parameters                 | 186                                                                             |                  |
| No. of restraints                 | 0                                                                               |                  |
| Largest diff. peak and hole       | 0.555 and -0.505 e.Å <sup>-3</sup>                                              |                  |



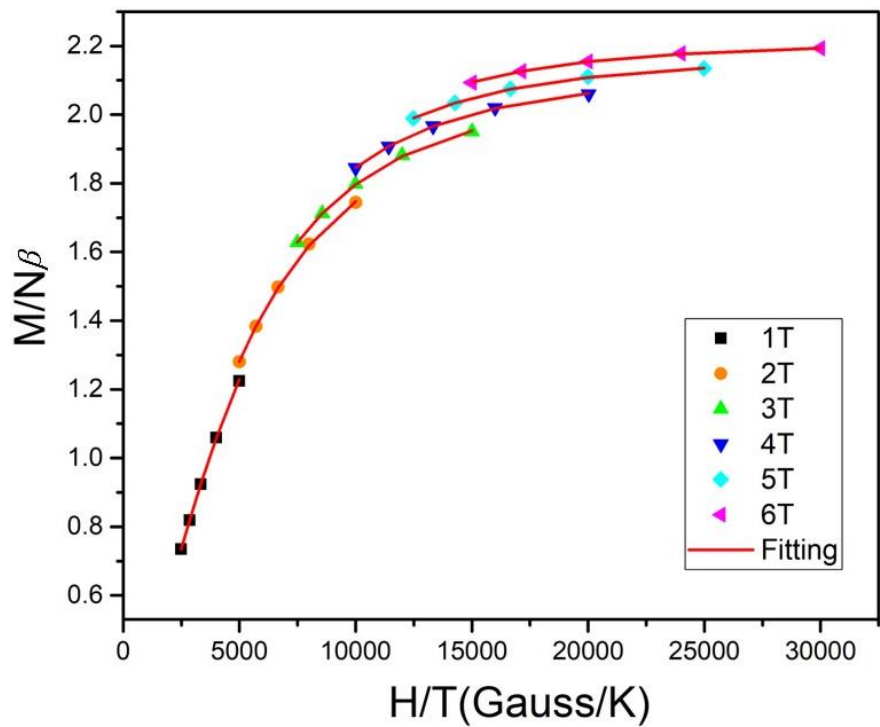

**Figure 6S** the result of reduced magnetization of compound (2)

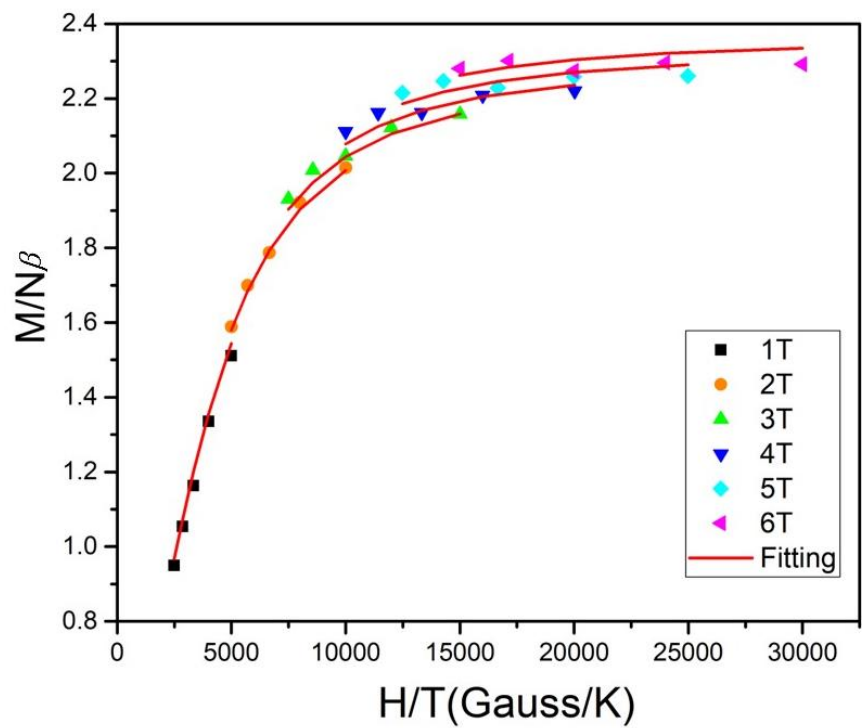

**Figure 7S.** the result of reduced magnetization of compound (3)

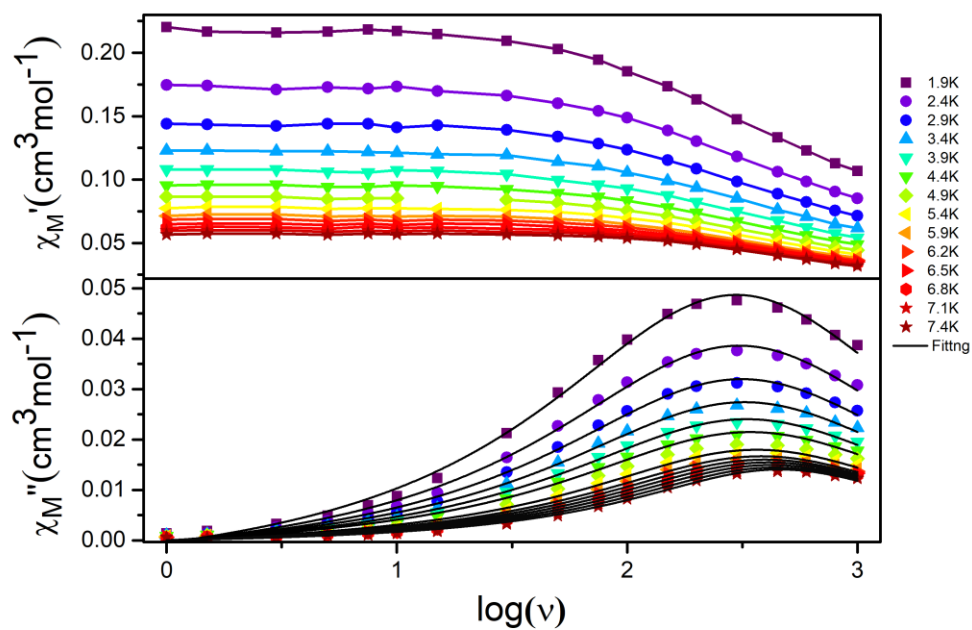

**Figure 8S.** Frequency dependence of the in-phase (top) and out-of-phase signals (bottom) of compound (**1**) under *zero* dc field.

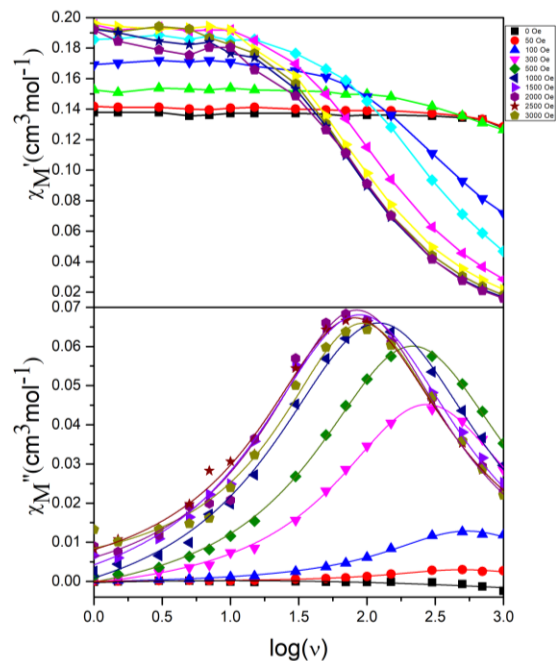

**Figure 9S.** Field dependence of the in-phase and the out-of-phase signals of compound (2) under 0-3000 G dc field at 2.8 K.

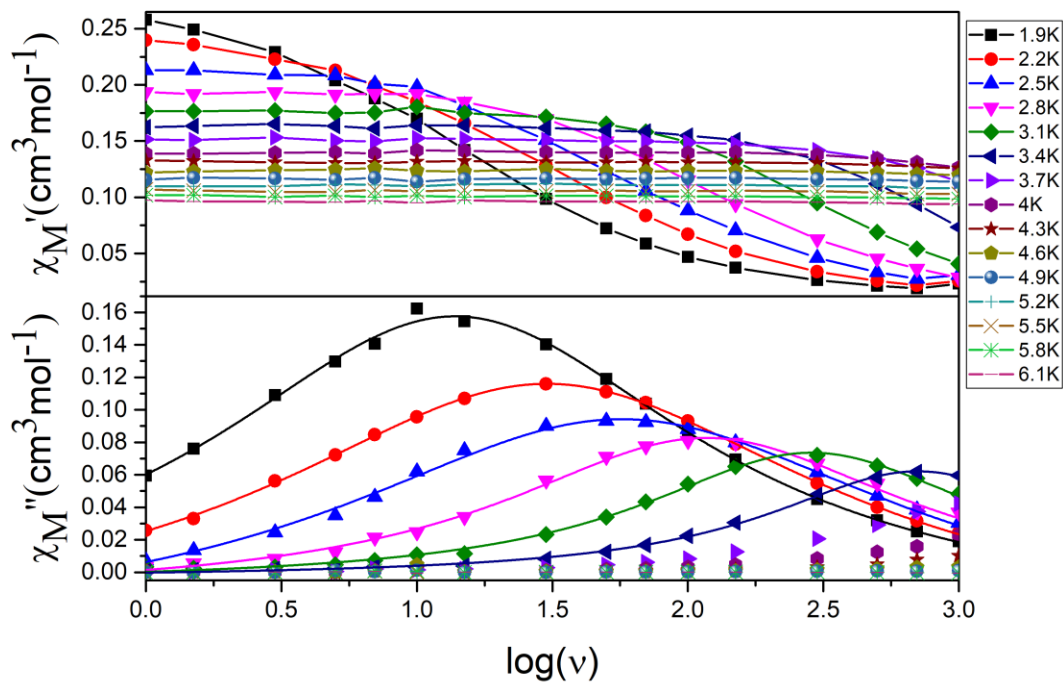

**Figure 10S.** Frequency dependence of the in-phase and out-of-phase signals of compound (2) under 1000 G dc field.

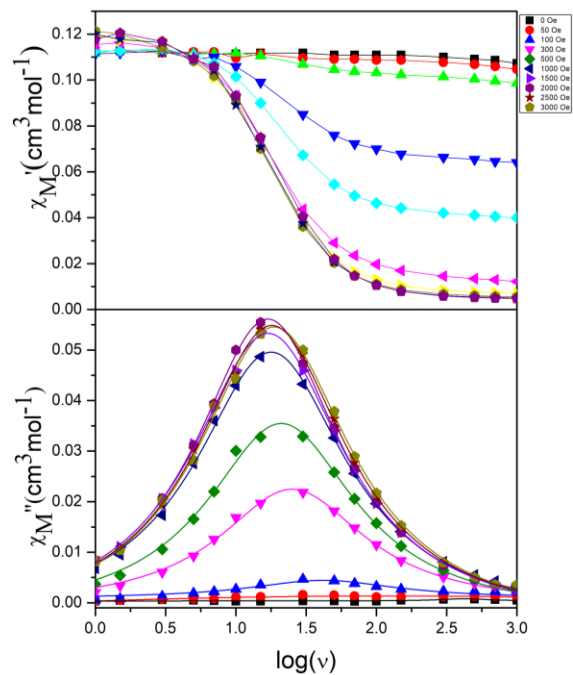

**Figure 11S.** Field dependence of the in-phase and the out-of-phase signals of compound (3) under 0-3000 G dc field at 4.0 K

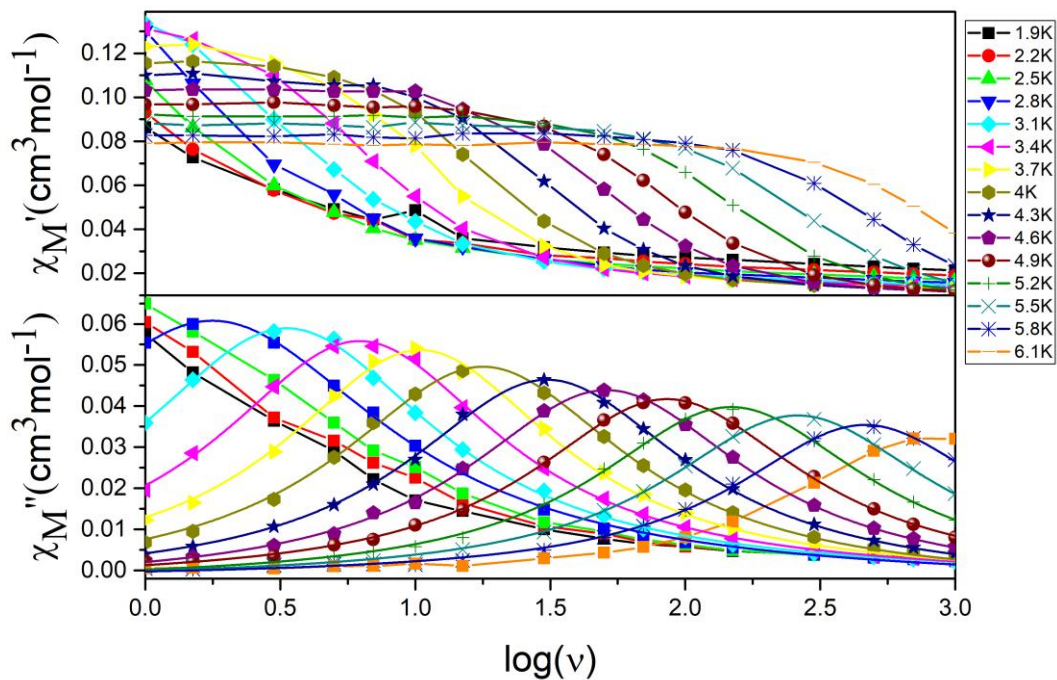

**Figure 12S.** Frequency dependence of the in-phase and out-of-phase signals of compound (3) under 1000 G dc field.

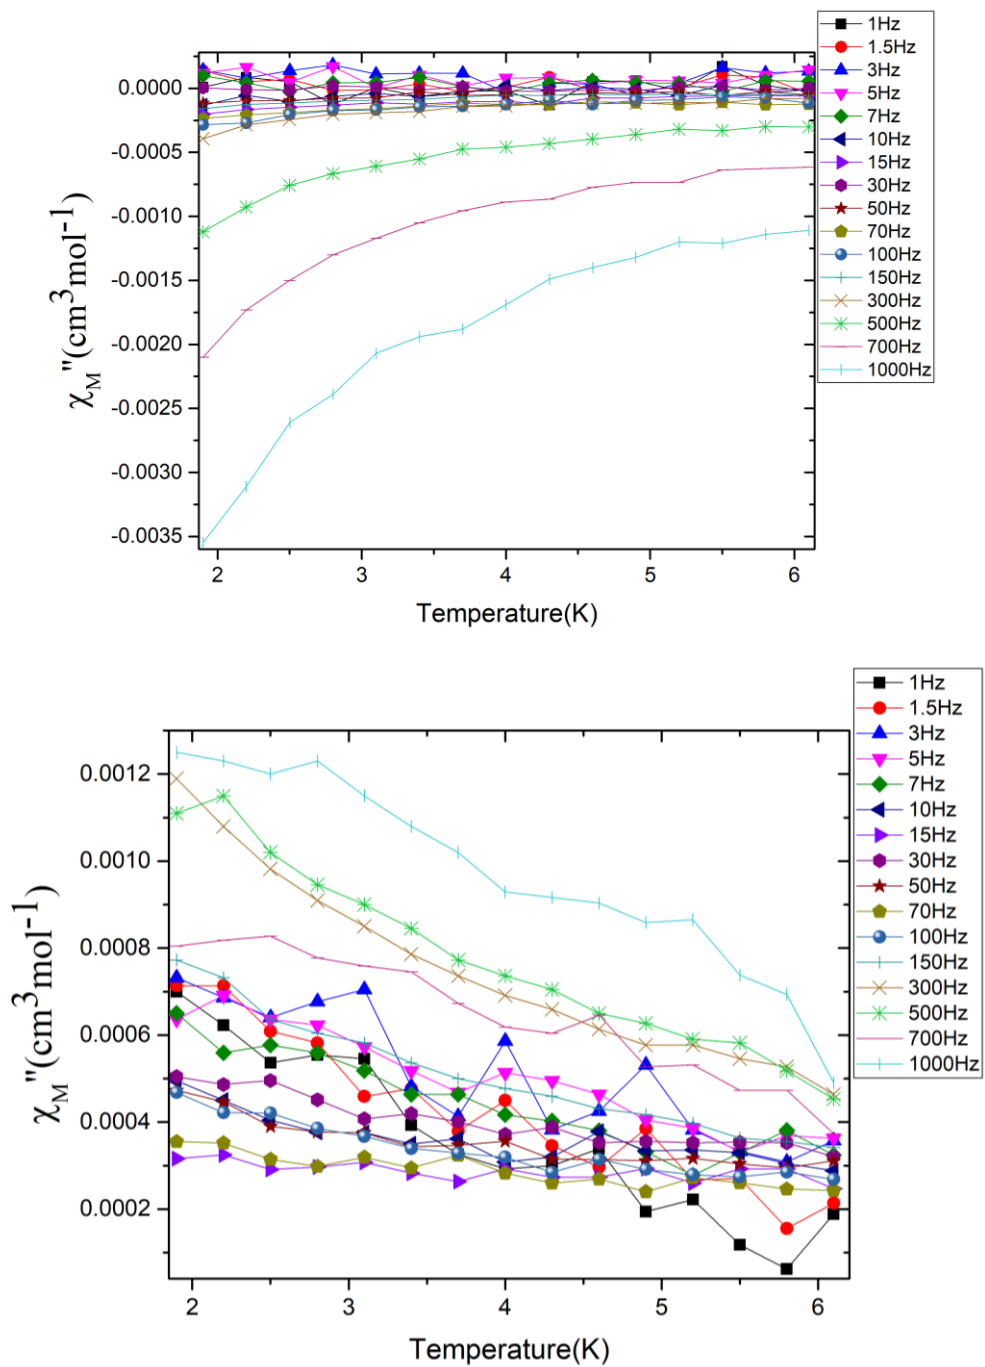

**Figure 13S.** Temperature dependence of the out-of-phase signals of compound (2) and (3) under 0 G dc field
